# Supplementary material for: Hydrolytically stable nanosheets of Cu–imidazolate MOF for selective trapping and simultaneous removal of multiple heavy metal ions
Source: Royal Society of Chemistry journal article supplement (doi:10.1039/d3en00754e), 2024-01-01
Supplement: d3en00754e1.pdf [file d3en00754e1.pdf]

## Supporting Information for

### Hydrolytically stable nanosheets of Cu-Imidazolate MOF for selective trapping and simultaneous removal of multiple heavy metal ions.

Prathmesh Bhadane<sup>a</sup>, Priya Mahato<sup>a</sup>, Dhruv Menon<sup>b</sup>, Biraj Kanta Satpathy<sup>a</sup>, Lisi Wu<sup>c</sup>, Swaroop Chakraborty<sup>c</sup>, Prateek Goyal<sup>a</sup>, Iseult Lynch<sup>c</sup>, Superb K. Misra<sup>a,\*</sup>

<sup>a</sup>Materials Engineering, Indian Institute of Technology Gandhinagar, Gujarat 382355, India.

<sup>b</sup>Department of Chemical Engineering and Biotechnology, University of Cambridge, Cambridge, CB3 0AS, United Kingdom.

<sup>c</sup>School of Geography, Earth and Environmental Sciences, University of Birmingham, Edgbaston, Birmingham, B152TT, United Kingdom.

\*Email: [smisra@iitgn.ac.in](mailto:smisra@iitgn.ac.in)

#### Equations:

##### Batch adsorption experiments

- $$\text{Removal Efficiency (RE)}(\%) = \frac{C_0 - C_e}{C_0} * 100 \quad \text{Eq. 1}$$

- $$\text{Adsorption capacity } (q_e) = \frac{C_0 - C_e}{m} V \quad \text{Eq. 2}$$

- $$\text{Distribution Coefficient } (K_d) = \frac{C_0 - C_e}{C_e} \times \frac{V}{m} \quad \text{Eq. 3}$$

Where,  $C_0$  and  $C_e$  (mg/L) represents initial and equilibrium concentration of Pb(II) in supernatant respectively.  $m$  (g) is adsorbent mass,  $V$  (ml) is solution volume.

##### Kinetics studies

- Pseudo first-order kinetics:  $\ln(q_e - q_t) = \ln q_e - k_1 t \quad \text{Eq. 4}$

- Pseudo second-order kinetics: 
$$\frac{t}{q_t} = \frac{1}{k_2 q_e^2} + \frac{t}{q_e} \quad \text{Eq. 5}$$

Where,  $q_e$  and  $q_t$  represents the adsorption capacity at equilibrium and time  $t$  (mg/g), respectively.  $k_1$  ( $\text{min}^{-1}$ ) and  $k_2$  ( $\text{g mmol}^{-1} \text{min}^{-1}$ ) represents parameters for kinetic rate constants for pseudo-first-order and pseudo-second-order model, respectively.

##### Adsorption isotherm studies

- Langmuir adsorption isotherm: 
$$\frac{C_e}{q_e} = \frac{C_e}{q_{max}} + \frac{1}{k_1 q_{max}} \quad \text{Eq. 6}$$

- Freundlich adsorption isotherm: 
$$\log q_e = \log K_f + \frac{1}{n} \log C_e \quad \text{Eq. 7}$$

- Separation factor ( $R_L$ ) = 
$$\frac{1}{1 + K_L C_0} \quad \text{Eq. 8}$$

Where,  $q_{max}$  and  $q_e$  represents the maximum (theoretical) and equilibrium adsorption capacity (mg/g) respectively,  $C_e$  is adsorbate concentration at equilibrium (mg/L),  $k_L$  (L/mg) and  $K_F$  (L/mg) represents

the Langmuir (represents the binding strength) and Freundlich constant (represent the adsorption capacity) respectively and  $1/n$  (ranging 0-1) represent the adsorption intensity.

**Adsorption thermodynamics studies**

- $\ln(K) = -\left(\frac{\Delta H^0}{R}\right)\frac{1}{T} + \frac{\Delta S^0}{R}$
- $\Delta G^0 = \Delta H^0 - T\Delta S^0$

Eq. 9

Eq. 10

Where,  $K (q_e/C_e)$  represents the equilibrium constant (L/g),  $T$  represents temperature (K) and  $R$  (8.314 J mol<sup>-1</sup> K<sup>-1</sup>) represents gas constant.

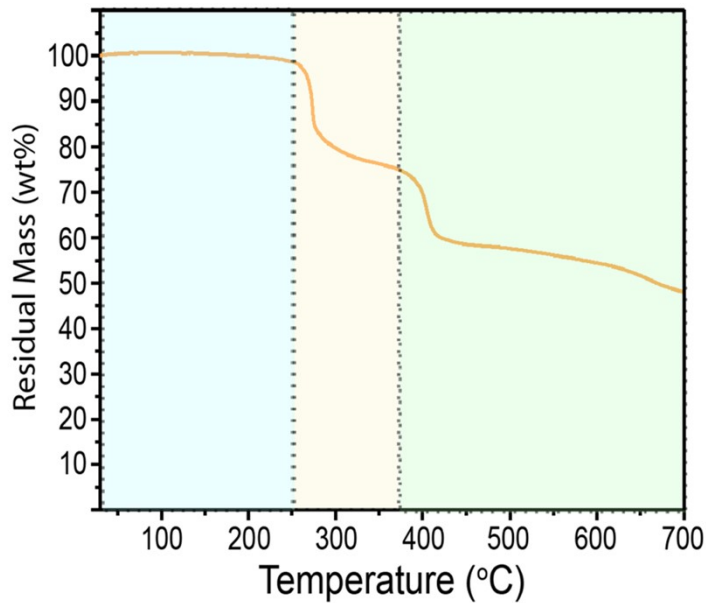

**Fig. S1.** Thermogravimetric analysis (TGA) of Cu-Im showing three distinctive regions of behaviour suggesting high thermal stability up to 240°C.

### BETSI Analysis for Culm\_BET

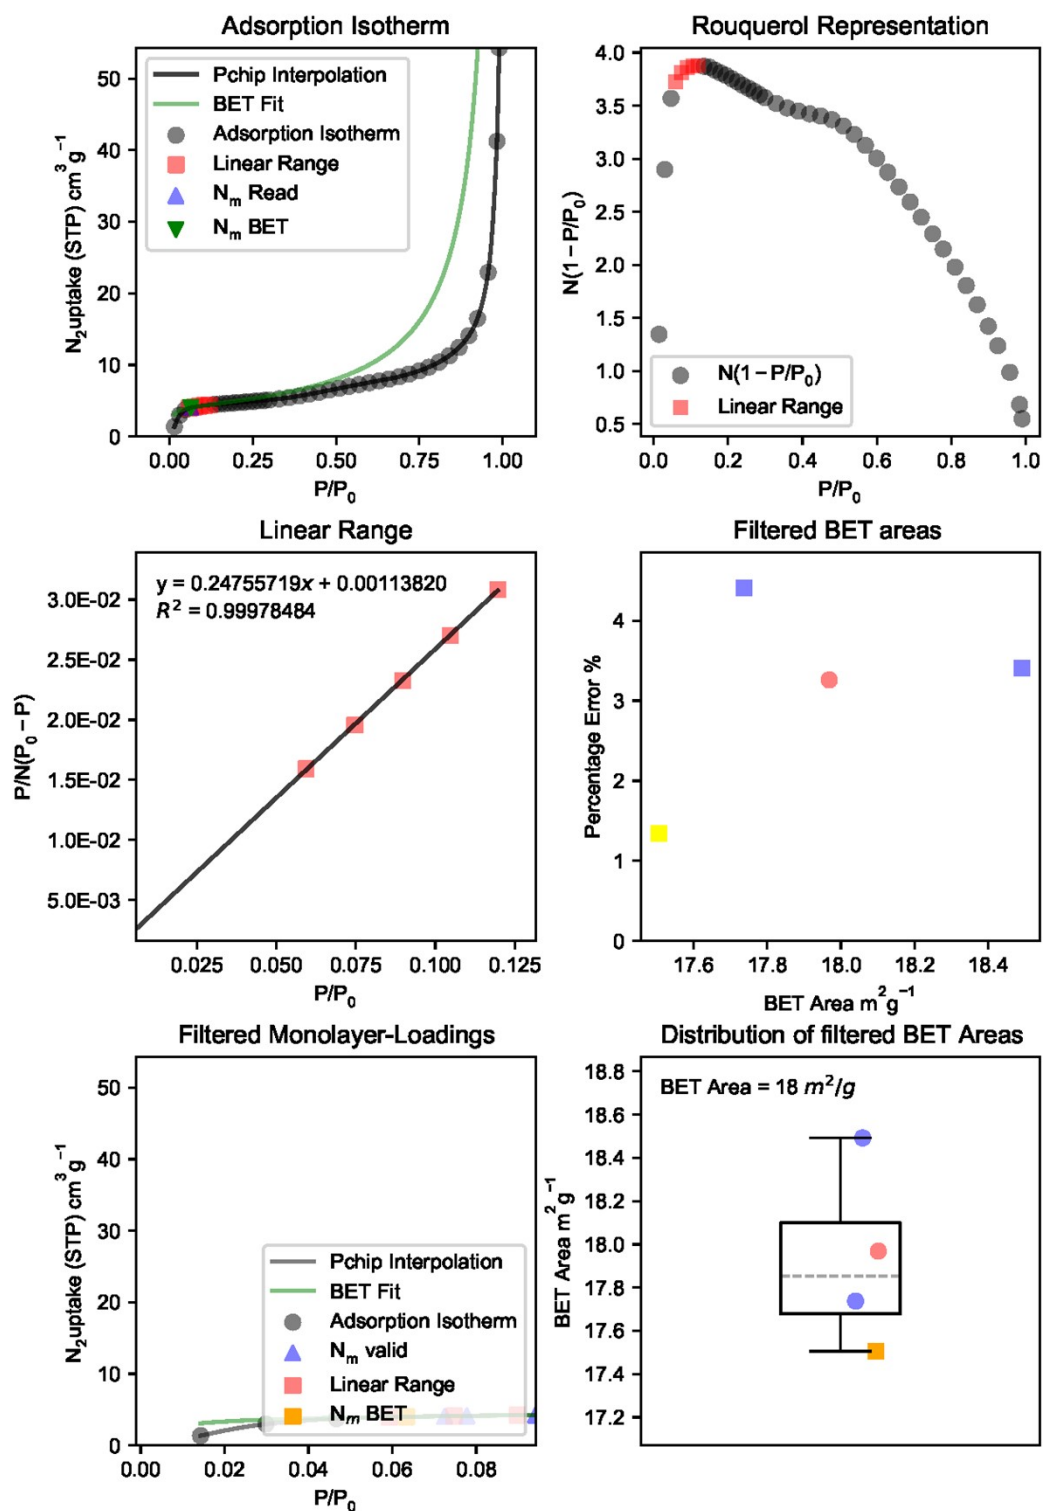

**Fig. S2.** Elaboration of the BET surface area using the Rouquerol criteria as implemented using the BETSI algorithm. BETSI predicts the BET surface area to be 18  $\text{m}^2\text{g}^{-1}$ . For a detailed understanding of the implementation of this analysis, readers are directed to Fairen-Jimenez et al.<sup>1</sup>

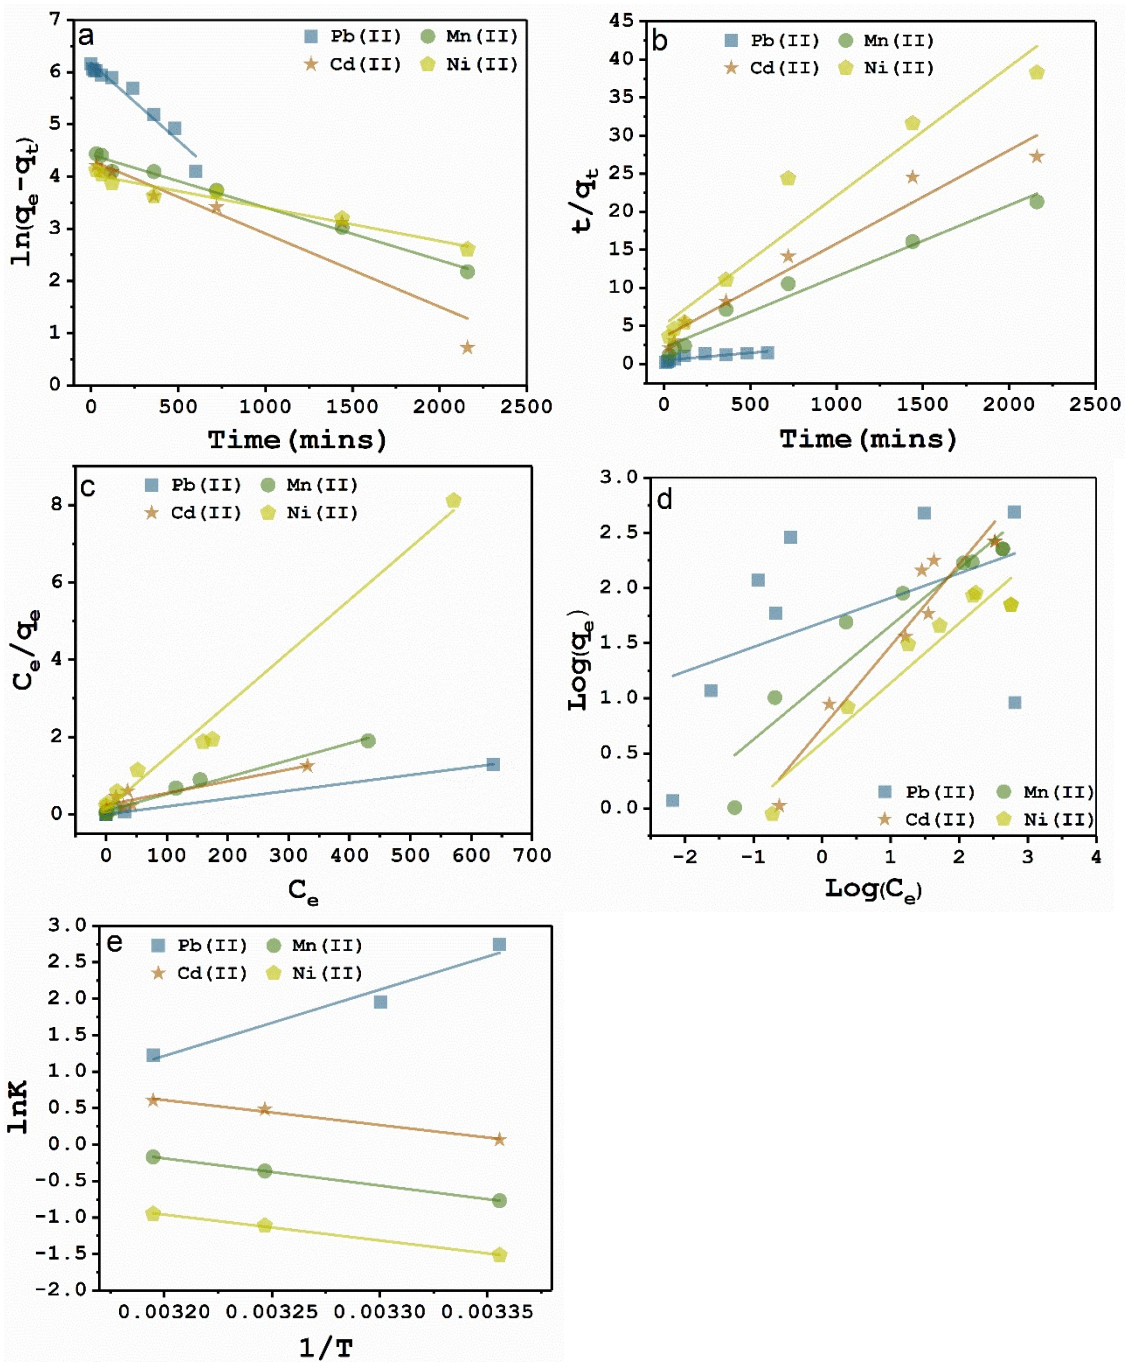

**Fig S3.** a. pseudo-first-order kinetics reaction linear fitted data, b. pseudo-second-order kinetics reaction linear fitted data, c. Langmuir adsorption isotherm, d. Freundlich adsorption isotherm, e. adsorption thermodynamics (Van't Hoff plot).

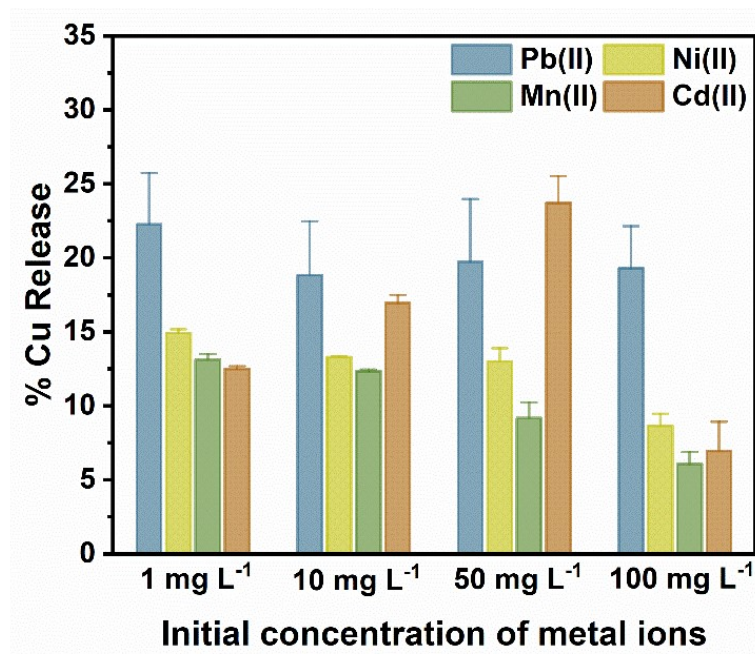

**Fig. S4.** Copper release profile. % Cu release profile for removal of heavy metal ions with varied initial metal concentration in ultrapure water. (MOF concentration: 1000 mg L<sup>-1</sup>).

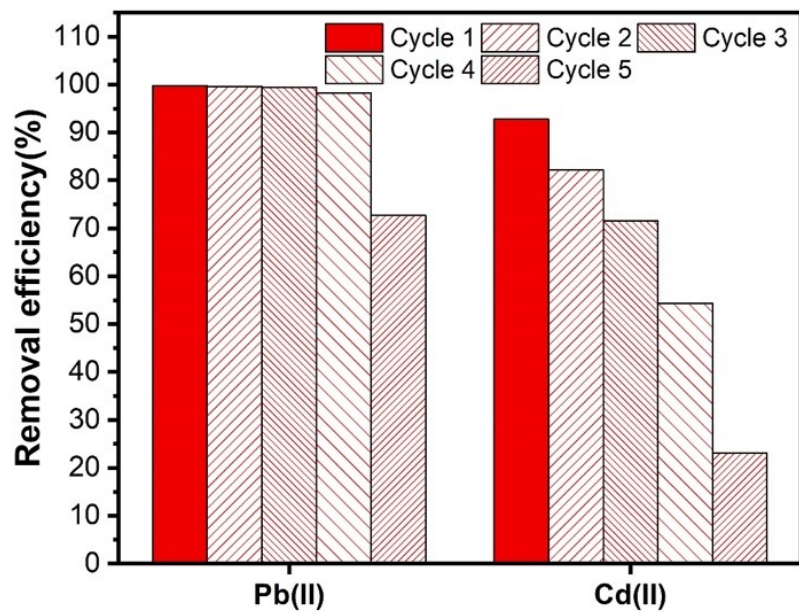

**Fig. S5.** Removal efficiency of Cu-Im MOF for metal ions adsorption over 5 cycles. (MOF concentration: 1000 mg L<sup>-1</sup>, Initial metal ion concentration: 1 – 500 mg L<sup>-1</sup> for Cd(II) and 1-1000 mg L<sup>-1</sup> for Pb(II), at pH 5 and temperature: 25 °C).

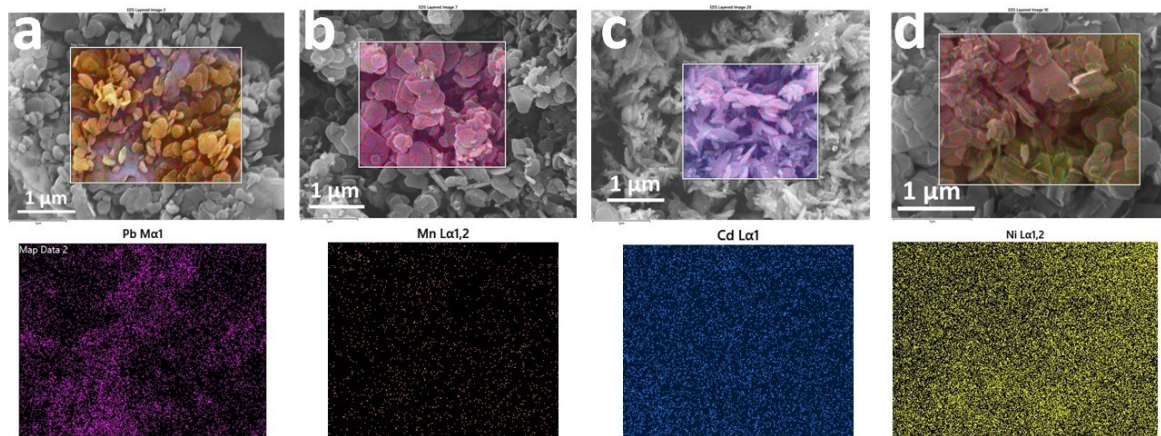

**Fig. S6.** Post-adsorption study using EDS elemental mapping, a. Pb adsorbed Cu-Im, b. Mn adsorbed Cu-Im, c. Cd adsorbed Cu-Im and d. Ni adsorbed Cu-Im.

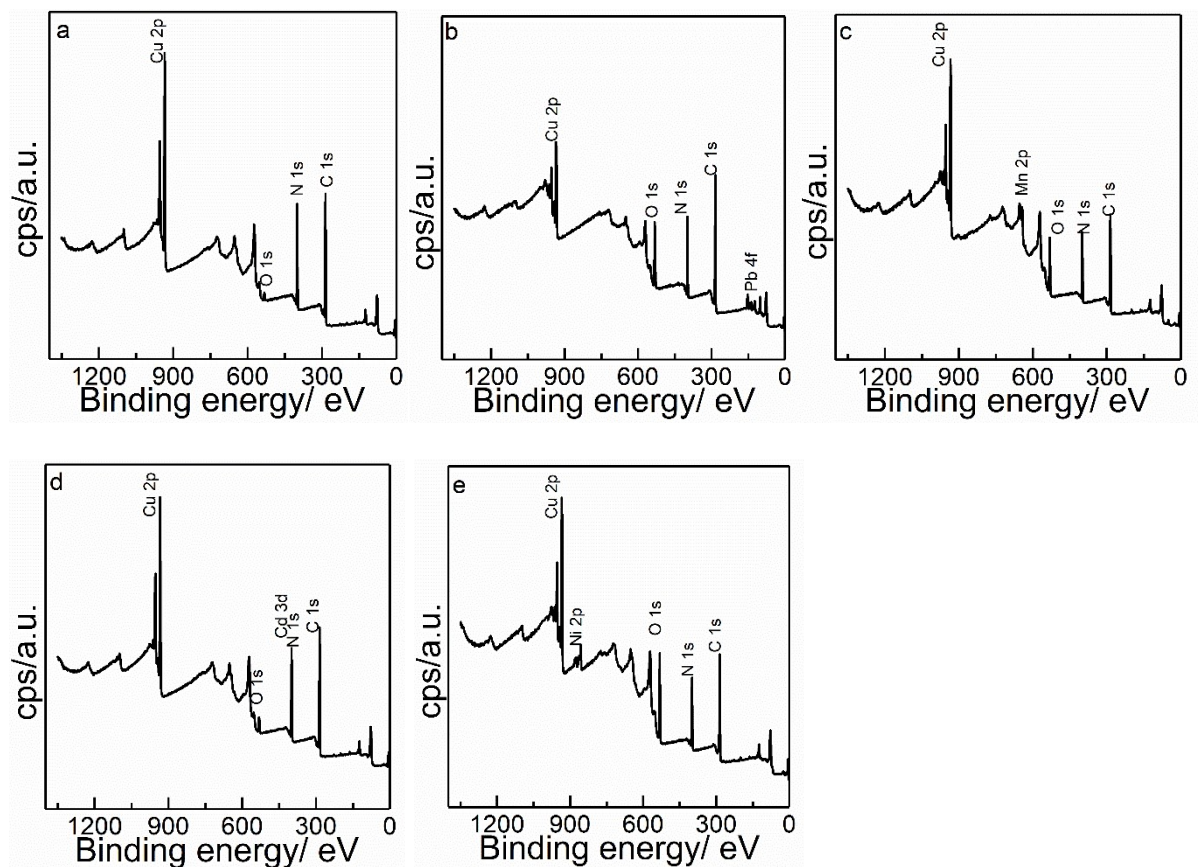

**Fig. S7.** XPS survey spectrum of a. pristine Cu-Im MOF, b. Pb adsorbed Cu-Im, c. Mn adsorbed Cu-Im, d. Cd adsorbed Cu-Im and e. Ni adsorbed Cu-Im.

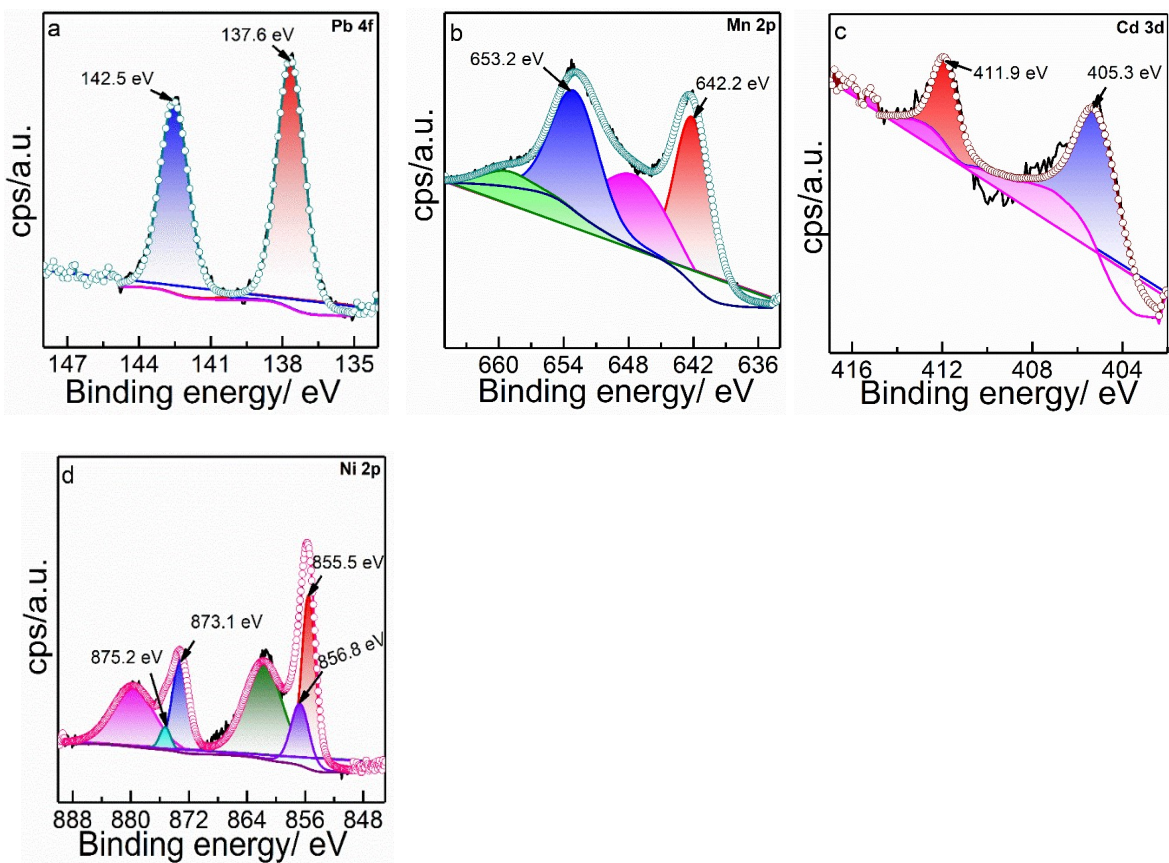

**Fig. S8.** XPS high resolution spectra of a. Pb 4f (in Pb adsorbed Cu-Im), b. Mn 2p (in Mn adsorbed Cu-Im), c. Cd 3d (in Cd adsorbed Cu-Im), d. Ni 2p (in Ni adsorbed Cu-Im).

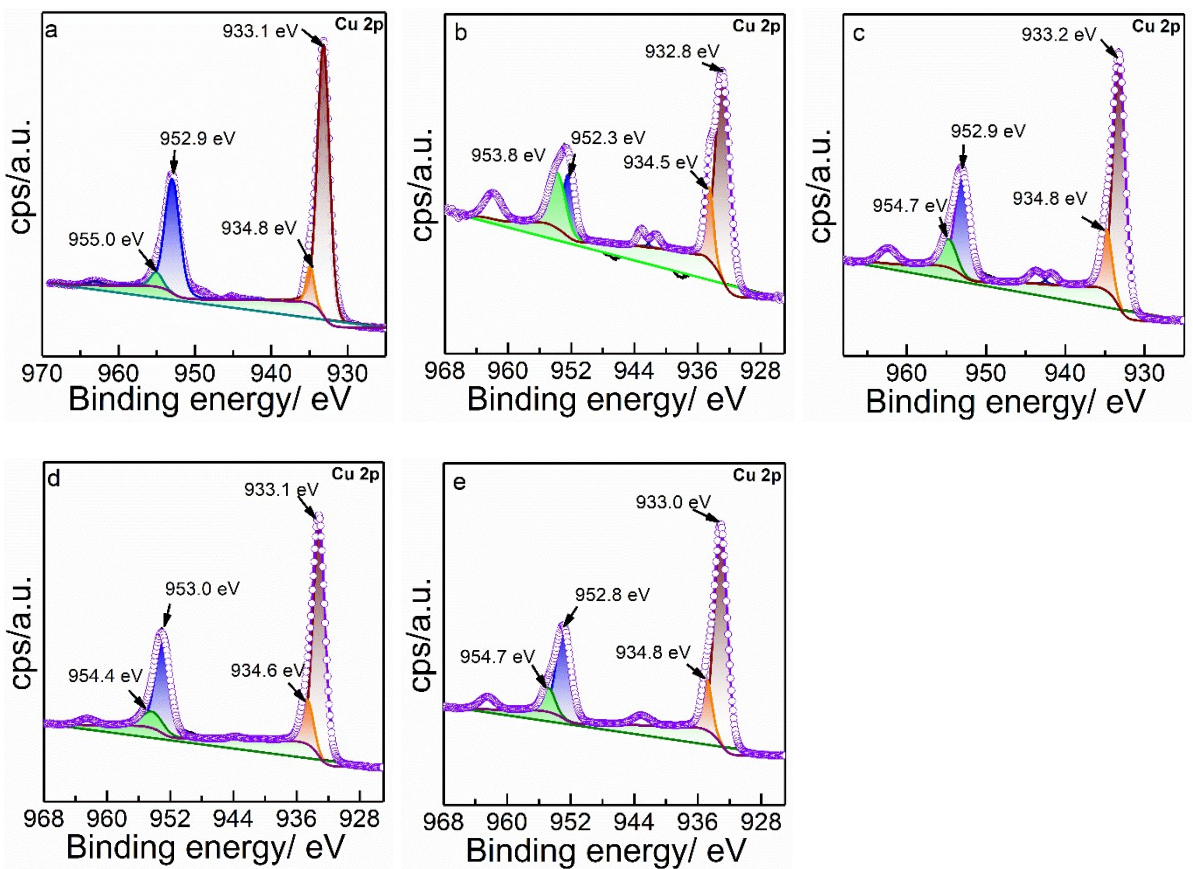

**Fig. S9.** XPS high resolution Cu 2p spectra of a. pristine Cu-Im MOF, b. Pb adsorbed Cu-Im, c. Mn adsorbed Cu-Im, d. Cd adsorbed Cu-Im and e. Ni adsorbed Cu-Im.



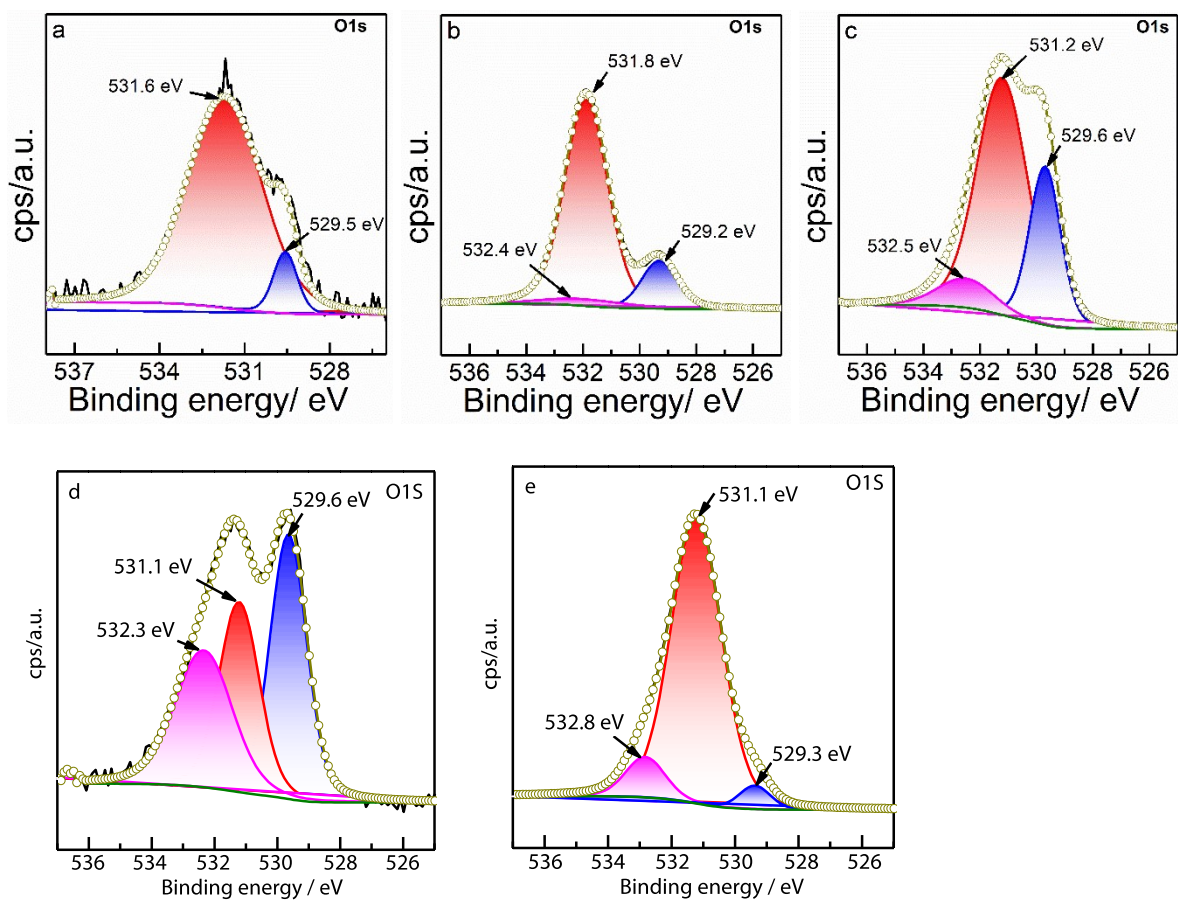

**Fig. S10.** XPS high resolution O1s spectra of a. pristine Cu-Im MOF, b. Pb adsorbed Cu-Im, c. Mn adsorbed Cu-Im, d. Cd adsorbed Cu-Im and e. Ni adsorbed Cu-Im.

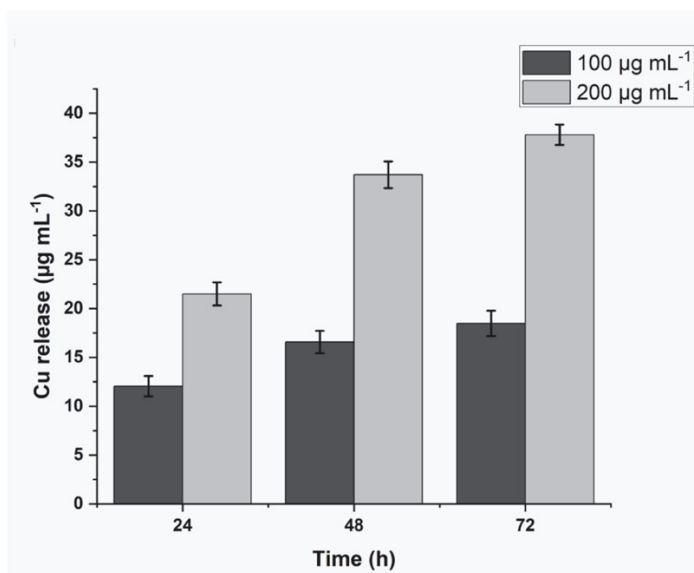

**Fig. S11.** Cu leaching from Cu-Im framework as a function of time at concentrations of  $100 \mu\text{g mL}^{-1}$  and  $200 \mu\text{g mL}^{-1}$ .

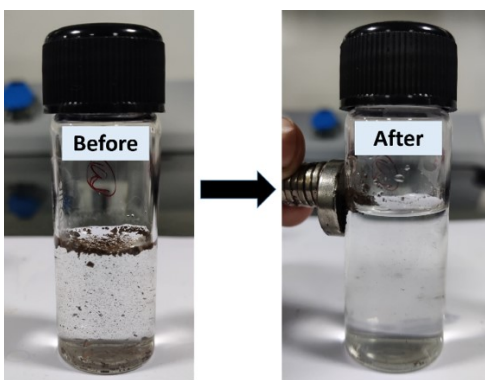

**Fig. S12** Images of MOF-magnetic nanoparticle hybrids which could be used to effectively separate the MOF particles from water

**Table S1.** List of various MOF-based and other adsorbents used for Pb(II), Cd(II) capture from water, as depicted in Figure 6c in the manuscript.

|     | Material Name                                                                                                                                                                  | Pb (II)<br>Adsorption<br>Capacity<br>(mg g <sup>-1</sup> ) | Cd (II)<br>Adsorption<br>Capacity<br>(mg g <sup>-1</sup> ) | Mn(II)<br>Adsorption<br>Capacity<br>(mg g <sup>-1</sup> ) | Ni(II)<br>Adsorption<br>Capacity<br>(mg g <sup>-1</sup> ) | Ref               |
|-----|--------------------------------------------------------------------------------------------------------------------------------------------------------------------------------|------------------------------------------------------------|------------------------------------------------------------|-----------------------------------------------------------|-----------------------------------------------------------|-------------------|
| 1.  | Cu-Im                                                                                                                                                                          | 490                                                        | 327                                                        | 233                                                       | 72                                                        | This work         |
| 2.  | dithizone-modified Fe <sub>3</sub> O <sub>4</sub> nanoparticles and copper-(benzene-1,3,5-tricarboxylate) MOF nanocomposite                                                    | 108                                                        | 188                                                        |                                                           | 98                                                        | Ref <sup>4</sup>  |
| 3.  | TMU-5                                                                                                                                                                          | 281                                                        | 43                                                         |                                                           |                                                           | Ref <sup>5</sup>  |
| 4.  | MOF-199 containing magnetite (Fe <sub>3</sub> O <sub>4</sub> ) nanoparticles carrying covalently immobilized 4-(thiazolylazo) resorcinol (Fe <sub>3</sub> O <sub>4</sub> @TAR) | 185                                                        | 210                                                        |                                                           | 196                                                       | Ref <sup>6</sup>  |
| 5.  | MOF-808-EDTA                                                                                                                                                                   | 313                                                        |                                                            |                                                           |                                                           | Ref <sup>7</sup>  |
| 6.  | MIL-101(Fe)                                                                                                                                                                    | 198                                                        | 155                                                        |                                                           |                                                           | Ref <sup>8</sup>  |
| 7.  | UiO-66-EDA                                                                                                                                                                     | 243                                                        | 217                                                        |                                                           |                                                           | Ref <sup>9</sup>  |
| 8.  | MOF-based melamine foams                                                                                                                                                       | 422                                                        | 222                                                        |                                                           |                                                           | Ref <sup>10</sup> |
| 9.  | UiO-66-SO <sub>3</sub> H                                                                                                                                                       | 176                                                        | 194                                                        |                                                           |                                                           | Ref <sup>11</sup> |
| 10. | Zr-MOF (free carboxylic group)                                                                                                                                                 | 100                                                        | 37                                                         |                                                           |                                                           | Ref <sup>12</sup> |
| 11. | HS-mSi@MOF-5                                                                                                                                                                   | 312                                                        | 98                                                         |                                                           |                                                           | Ref <sup>13</sup> |
| 12. | Fe <sub>3</sub> O <sub>4</sub> -ZrMOF@GSH                                                                                                                                      | 409                                                        | 403                                                        |                                                           |                                                           | Ref <sup>14</sup> |
| 13. | UiO-66-NHC(S)NHMe                                                                                                                                                              | 232                                                        | 49                                                         |                                                           |                                                           | Ref <sup>15</sup> |
| 14. | Fe <sub>3</sub> O <sub>4</sub> @UiO-66-NH <sub>2</sub>                                                                                                                         | 833                                                        | 714                                                        |                                                           |                                                           | Ref <sup>16</sup> |
| 16. | UiO-66 with melamine                                                                                                                                                           | 175                                                        | 146                                                        |                                                           |                                                           | Ref <sup>17</sup> |
| 17. | DNPH modified -Al <sub>2</sub> O <sub>3</sub>                                                                                                                                  | 100                                                        | 83                                                         | 6                                                         | 18                                                        | Ref <sup>18</sup> |
| 18. | Hydrated ferric oxide                                                                                                                                                          | 211                                                        | 147                                                        |                                                           |                                                           | Ref <sup>19</sup> |
| 19. | Calcium titanate                                                                                                                                                               | 124                                                        | 8                                                          |                                                           |                                                           | Ref <sup>20</sup> |
| 20. | Plasma modified biochar                                                                                                                                                        | 123                                                        | 61                                                         |                                                           |                                                           | Ref <sup>21</sup> |
| 21. | MCs@Mg/Fe-LDHs                                                                                                                                                                 | 759                                                        |                                                            |                                                           |                                                           | Ref <sup>22</sup> |
| 22. | Chitosan/GO nanofibers                                                                                                                                                         | 461                                                        |                                                            |                                                           |                                                           | Ref <sup>23</sup> |
| 23. | Oxidized MWCNTs                                                                                                                                                                | 75                                                         | 66                                                         |                                                           | 59                                                        | Ref <sup>24</sup> |
| 24. | Na-Y/ZnO/NH <sub>2</sub> /SH composite                                                                                                                                         | 295                                                        |                                                            |                                                           | 177                                                       | Ref <sup>25</sup> |
| 25. | ultrafine mesoporous                                                                                                                                                           | 85                                                         | 79                                                         |                                                           | 66                                                        | Ref <sup>26</sup> |

|     |                                                                   |     |     |     |     |                   |
|-----|-------------------------------------------------------------------|-----|-----|-----|-----|-------------------|
|     | magnetite (Fe <sub>3</sub> O <sub>4</sub> ) nanoparticles (UFMNP) |     |     |     |     |                   |
| 26. | EDTA-GO                                                           | 508 |     |     |     | Ref <sup>27</sup> |
| 27. | Zeolite NaY                                                       | 454 |     |     |     | Ref <sup>28</sup> |
| 28. | Magnetic Nanoparticle/Nanocomposite Beads                         | 23  | 12  |     |     | Ref <sup>29</sup> |
| 29  | poly (sodium acrylate)-graphene oxide (PSA-GO)                    |     | 238 | 238 |     | Ref <sup>30</sup> |
| 30  | ZIF-8/PAN Nanofibers                                              |     | 127 |     |     | Ref <sup>31</sup> |
| 31  | Unmodified Nigerian kaolinite clay (UAK)                          |     |     | 111 | 166 | Ref <sup>32</sup> |
| 32  | NaCl-activated clinoptilolite+mordenite                           |     |     | 21  |     | Ref <sup>33</sup> |

**Dataset S1 (attached as a CSV file contains the list of MOFs used for the benchmark studies).** Under the common name, the attached number corresponds to the reference in Burtch et al.<sup>2</sup> from where the metal centre and linker are extracted. The linker is represented using the SMILES format<sup>3</sup>, making it easily featurizable for t-SNE visualisation.

## References.

1. J. W. Osterrieth, et al., **2022** How reproducible are surface areas calculated from the BET equation?. *Advanced Materials*, 34(27) 2201502.
2. N.C Burtch, H. Jasuja, K. S. Walton, **2014** Water stability and adsorption in metal–organic frameworks. *Chemical Reviews*, 114(20), 10575.
3. D. Weininger, SMILES, a chemical language and information system. 1. **1988** Introduction to methodology and encoding rules. *Journal of Chemical Information and Computer Sciences*, 28(1), 31.
4. Taghizadeh, M., et al **2013**. A novel magnetic metal organic framework nanocomposite for extraction and preconcentration of heavy metal ions, and its optimization via experimental design methodology. *Microchimica Acta*, 180, 1073.
5. Tahmasebi, E., et al **2015**. Application of mechanothesized azine-decorated zinc (II) metal–organic frameworks for highly efficient removal and extraction of some heavy-metal ions from aqueous samples: a comparative study. *Inorganic chemistry*, 54(2), pp.425-433.
6. Ghorbani-Kalhor, E., **2016**. A metal-organic framework nanocomposite made from functionalized magnetite nanoparticles and HKUST-1 (MOF-199) for preconcentration of Cd (II), Pb (II), and Ni (II). *Microchimica Acta*, 183, 2639.
7. Peng, Y., et al **2018**. A versatile MOF-based trap for heavy metal ion capture and dispersion. *Nature communications*, 9(1), 187.
8. Babazadeh, M., et al **2015**. Solid phase extraction of heavy metal ions from agricultural samples with the aid of a novel functionalized magnetic metal–organic framework. *RSC Adv.*, 5(26), 19884.
9. Ahmadijokani, F., et al **2021**. Ethylenediamine-functionalized Zr-based MOF for efficient removal of heavy metal ions from water. *Chemosphere*, 264, 128466.
10. Hu, Q., et al. **2021**. Ultrastable MOF-based foams for versatile applications. *Nano Res.*, pp.1-10.
11. Gul, S., et al. **2022**. Effective adsorption of cadmium and lead using SO<sub>3</sub>H-functionalized Zr-MOFs in aqueous medium. *Chemosphere*, 307, p.135633.
12. Nimbalkar, M.N. and Bhat, B.R., **2021**. Simultaneous adsorption of methylene blue and heavy metals from water using Zr-MOF having free carboxylic group. *Journal of Environmental Chemical Engineering*, 9(5), 106216.
13. Zhang, J., et al. **2016**. Exploring a thiol-functionalized MOF for elimination of lead and cadmium from aqueous solution. *Journal of Molecular Liquids*, 221, 43.

14. Ragheb, E., et al. **2022**. Modified magnetic-metal organic framework as a green and efficient adsorbent for removal of heavy metals. *J. Env. Chem. Eng.*, 10(2), 107297.
15. Saleem, H., et al. **2016**. Investigations on post-synthetically modified UiO-66-NH<sub>2</sub> for the adsorptive removal of heavy metal ions from aqueous solution. *Microporous and Mesoporous Materials*, 221, 238.
16. Abdel-Magied, A.F., et al. **2022**. Magnetic metal-organic frameworks for efficient removal of cadmium (II), and lead (II) from aqueous solution. *J. Env. Chem. Eng.*, 10(3), 107467.
17. Abdelmoaty, A.S., et al. **2022**. High performance of UiO-66 metal-organic framework modified with melamine for uptaking of lead and cadmium from aqueous solutions. *Journal of Inorganic and Organometallic Polymers and Materials*, 32(7), 2557.
18. Afkhami, A., et al. **2010**. Simultaneous removal of heavy-metal ions in wastewater samples using nano-alumina modified with 2, 4-dinitrophenylhydrazine. *J. Haz. Mat.*, 181(1-3), 836.
19. Manju, G.N., et al. **2002**. An investigation into the sorption of heavy metals from wastewaters by polyacrylamide-grafted iron (III) oxide. *Journal of Hazardous materials*, 91(1-3), 221.
20. Zhang, D., **2011**. Preparation and characterization of nanometer calcium titanate immobilized on aluminum oxide and its adsorption capacity for heavy metal ions in water. *Advanced Materials Research*, 152, 670.
21. Liu, C. and Zhang, H.X., **2022**. Modified-biochar adsorbents (MBAs) for heavy-metal ions adsorption: A critical review. *Journal of Environmental Chemical Engineering*, 10(2), 107393.
22. Xie, Y., et al. **2019**. Adsorption behavior and mechanism of Mg/Fe layered double hydroxide with Fe<sub>3</sub>O<sub>4</sub>-carbon spheres on the removal of Pb (II) and Cu (II). *Journal of colloid and interface science*, 536, 440.
23. Najafabadi, H.H., et al. **2015**. Removal of Cu<sup>2+</sup>, Pb<sup>2+</sup> and Cr<sup>6+</sup> from aqueous solutions using a chitosan/graphene oxide composite nanofibrous adsorbent. *Rsc Advances*, 5(21), 16532.
24. Lasheen, M.R., et al. **2015**. Removal of heavy metals from aqueous solution by multiwalled carbon nanotubes: equilibrium, isotherms, and kinetics. *Desalination and Water Treatment*, 53(13), 3521.
25. Shoja, F. and Amani, M.A., **2020**. Multi-modification of Na-Y zeolite with ZnO nanoparticles, amine, and mercapto functional groups for single and simultaneous heavy metal adsorption from water system. *Research on Chemical Intermediates*, 46, 3569.
26. Fato, T.P., et al. **2019**. Simultaneous removal of multiple heavy metal ions from river water using ultrafine mesoporous magnetite nanoparticles. *ACS omega*, 4(4), 7543.
27. Cui, L., et al. **2015**. EDTA functionalized magnetic graphene oxide for removal of Pb (II), Hg (II) and Cu (II) in water treatment: adsorption mechanism and separation property. *Chem. Eng. J.*, 281, 1.
28. Shariatnia, Z. and Bagherpour, A., **2018**. Synthesis of zeolite NaY and its nanocomposites with chitosan as adsorbents for lead (II) removal from aqueous solution. *Powder Technology*, 338, 744.
29. ŞAHİN, M., et al. **2023**. Removal of Ni (II), Cu (II), Pb (II), and Cd (II) from Aqueous Phases by Silver Nanoparticles and Magnetic Nanoparticles/Nanocomposites. *ACS omega*, 8(38), 34834.
30. Xu, R., et al. **2015**. New double network hydrogel adsorbent: Highly efficient removal of Cd (II) and Mn (II) ions in aqueous solution. *Chemical Engineering Journal*, 275, 179.
31. Peng, L., et al. **2020**. Heavy metal elimination based on metal organic framework highly loaded on flexible nanofibers. *Environmental Research*, 188, 109742.
32. Dawodu, F.A. and Akpomie, K.G., **2014**. Simultaneous adsorption of Ni (II) and Mn (II) ions from aqueous solution onto a Nigerian kaolinite clay. *J. Materials research and technology*, 3(2), pp.129-141.
33. Taffarel, S.R. and Rubio, J., **2009**. On the removal of Mn<sup>2+</sup> ions by adsorption onto natural and activated Chilean zeolites. *Minerals Engineering*, 22(4), 336.
