# Supplementary material for: Hydrolytically stable nanosheets of Cu–imidazolate MOF for selective trapping and simultaneous removal of multiple heavy metal ions
Source: Royal Society of Chemistry journal article supplement (doi:10.1039/d3en00754e), 2024-01-01
Supplement: d3en00754e2.csv [file d3en00754e2.csv]

Index	Common name	Stability	Metal	Linker	1s	2s	2p	3s	3p	3d	4s	4p	5s	4d	5p	5d	6s	Linker SMILES
1	Bio-MOF-14(95)	3	['Co']	['AD', 'C4H9CO2']	2	2	6	2	6	7	2	0	0	0	0	0	0	C1=NC2=NC=NC(=C2N1)N
2	MIL-101(Cr)(28, 44, 49-51, 53, 62, 167)	3	['Cr']	['BDC', 'O', 'F', 'H2O']	2	2	6	2	6	5	1	0	0	0	0	0	0	c1cc(ccc1C(=O)O)C(=O)O
3	MIL-101-SO3H (Cr)(51, 301)	3	['Cr']	['BDCSO3H', 'O', 'F', 'H2O']	2	2	6	2	6	5	1	0	0	0	0	0	0	C1=CC(=C(C=C1S(=O)(=O)O)C(=O)O)C(=O)O
4	MIL-96(Al)(299, 302)	3	['Al']	['BTC', 'O', 'OH', 'H2O']	2	2	6	2	1	0	0	0	0	0	0	0	0	C1C(CC(CC1C(=O)O)C(=O)O)C(=O)O
5	N/A(261)	3	['Ni']	['BTP']	2	2	6	2	6	8	2	0	0	0	0	0	0	C1=C(C=C(C=C1C2=CNN=C2)C3=CNN=C3)C4=CNN=C4
6	ZIF-8(28, 62, 63, 105, 293)	3	['Zn']	['MEIM']	2	2	6	2	6	10	2	0	0	0	0	0	0	CC1=NC=CN1
7	Al-PMOF(303)	3	['Al']	['TCPP', 'OH']	2	2	6	2	1	0	0	0	0	0	0	0	0	C1=CC=C(C=C1)C2=C3C=CC(=C(C4=NC(=C(C5=CC=C(N5)C(=C6C=CC2=N6)C7=CC=CC=C7)C8=CC=CC=C8)C=C4)C9=CC=CC=C9)N3
8	JUC-110(93)	3	['Cd']	['THIPC']	2	2	6	2	6	10	2	6	2	10	0	0	0	C1C(NCC2=C1N=CN2)C(=O)O.O.O
9	MIL-100(Cr)(38, 39, 63)	3	['Cr']	['BTC', 'O', 'F']	2	2	6	2	6	5	1	0	0	0	0	0	0	C1C(CC(CC1C(=O)O)C(=O)O)C(=O)O
10	LaBTB(281)	3	['La']	['BTB', 'H2O']	2	2	6	2	6	10	2	6	2	10	2	1	2	C1=CC(=CC=C1C2=CC(=CC(=C2)C3=CC=C(C=C3)C(=O)O)C4=CC=C(C=C4)C(=O)O)C(=O)O
11	N/A(297)	3	['Cu']	['BTTRI', 'Cl']	2	2	6	2	6	10	1	0	0	0	0	0	0	C1=C(C=C(C=C1C2=NNN=C2)C3=NNN=C3)C4=NNN=C4
12	N/A(260)	3	['Zn']	['BDP']	2	2	6	2	6	10	2	0	0	0	0	0	0	C1=CC(=CC=C1C2=CNN=C2)C3=CNN=C3
13	N/A(261)	3	['Cu']	['BTP']	2	2	6	2	6	10	1	0	0	0	0	0	0	C1=C(C=C(C=C1C2=CNN=C2)C3=CNN=C3)C4=CNN=C4
14	N/A(261)	3	['Zn']	['BTP']	2	2	6	2	6	10	2	0	0	0	0	0	0	C1=C(C=C(C=C1C2=CNN=C2)C3=CNN=C3)C4=CNN=C4
15	NOTT-300(300)	3	['Al']	['H4L', 'OH']	2	2	6	2	1	0	0	0	0	0	0	0	0	C1CON=CC2=C(C(=C(C=C2)C=NOCCON=CC3=C(C(=CC=C3)OCC=CCOC4=CC=CC(=C4O)C=NO1)O)O)O
17	CAU-10(110)	2	['Al']	['ISO', 'OH']	2	2	6	2	1	0	0	0	0	0	0	0	0	OC(=O)c1cccc(c1)C(O)=O
18	DUT-51(Zr)(55)	2	['Zr']	['DTTDC', 'OH', 'O']	2	2	6	2	6	10	2	6	2	2	0	0	0	C1=C(SC2=C1SC3=C2SC(=C3)C(=O)O)C(=O)O
19	DUT-67(Zr)(56, 110)	2	['Zr']	['TDC', 'OH', 'O']	2	2	6	2	6	10	2	6	2	2	0	0	0	C1=C(SC(=C1)C(=O)O)C(=O)O
20	FMOF-1(92)	2	['Ag']	['TZ']	2	2	6	2	6	10	2	6	1	10	0	0	0	C1(=NC(=NN1)C(F)(F)F)C(F)(F)F
21	MIL-100(Al)(37, 299)	2	['Al']	['BTC', 'O', 'F', 'H2O']	2	2	6	2	1	0	0	0	0	0	0	0	0	C1C(CC(CC1C(=O)O)C(=O)O)C(=O)O
22	MIL-100(Fe)(28, 37, 41, 42, 44)	2	['Fe']	['BTC', 'O', 'F', 'H2O']	2	2	6	2	6	6	2	0	0	0	0	0	0	C1C(CC(CC1C(=O)O)C(=O)O)C(=O)O
23	MIL-127(42)	2	['Fe']	['TAZB', 'O', 'OH']	2	2	6	2	6	6	2	0	0	0	0	0	0	O=C(O)c2cc(/N=N/c1cc(C(=O)O)cc(C(=O)O)c1)cc(C(=O)O)c2
24	MIL-53(Al)(62, 268, 307)	2	['Al']	['BDC', 'OH']	2	2	6	2	1	0	0	0	0	0	0	0	0	c1cc(ccc1C(=O)O)C(=O)O
25	MOF-525(265)	2	['Zr']	['TCPP', 'OH', 'O']	2	2	6	2	6	10	2	6	2	2	0	0	0	C1=CC=C(C=C1)C2=C3C=CC(=C(C4=NC(=C(C5=CC=C(N5)C(=C6C=CC2=N6)C7=CC=CC=C7)C8=CC=CC=C8)C=C4)C9=CC=CC=C9)N3
26	MOF-801-P(110)	2	['Zr']	['FUM', 'OH', 'O']	2	2	6	2	6	10	2	6	2	2	0	0	0	C(=CC(=O)O)C(=O)O
27	MOF-802(110)	2	['Zr']	['PZDC', 'cooh', 'OH', 'O', 'H2O']	2	2	6	2	6	10	2	6	2	2	0	0	0	C1=C(NN=C1C(=O)O)C(=O)O
28	MOF-804(110)	2	['Zr']	['BDCOH2', 'OH', 'O']	2	2	6	2	6	10	2	6	2	2	0	0	0	C1=C(C(=CC(=C1O)C(=O)O)O)C(=O)O
29	MOF-841(110)	2	['Zr']	['MTB', 'cooh', 'OH', 'O', 'H2O']	2	2	6	2	6	10	2	6	2	2	0	0	0	C1=CC(=CC=C1C(=O)O)C(C2=CC=C(C=C2)C(=O)O)(C3=CC=C(C=C3)C(=O)O)C4=CC=C(C=C4)C(=O)O
30	N/A(61)	2	['Zn']	['BTC', 'OH', 'H2O']	2	2	6	2	6	10	2	0	0	0	0	0	0	C1C(CC(CC1C(=O)O)C(=O)O)C(=O)O
31	Ni-NIC(292)	2	['Ni']	['NIC', 'H2O']	2	2	6	2	6	8	2	0	0	0	0	0	0	C1=CC(=CN=C1)C(=O)O
32	NU-1000(283)	2	['Zr']	['TBAPY', 'OH']	2	2	6	2	6	10	2	6	2	2	0	0	0	C1=CC=C(C=C1)OC(=O)C2=CC=C(C=C2)C3=CC(=C4C=CC5=C(C=C(C6=C5C4=C3C=C6)C7=CC=C(C=C7)C(=O)OC8=CC=CC=C8)C9=CC=C(C=C9)C(=O)OC1=CC=CC=C1)C1=CC=C(C=C1)C(=O)OC1=CC=CC=C1
33	PCN-225(M)(192)	2	['Zr']	['TCPP', 'OH', 'O', 'H2O']	2	2	6	2	6	10	2	6	2	2	0	0	0	O=C(O)C1=CC=C(/C2=C3C=CC(/C(C4=CC=C(C=C4)C(O)=O)=C5C=C/C(N/5)=C(C6=CC=C(C=C6)C(O)=O)/C(C=C/7)=NC7=C(C8=CC=C(C=C8)C(O)=O)/C9=CC=C2N9)=N\3)C=C1
34	UiO-66(31, 41, 42, 58, 98, 101, 110, 310)	2	['Zr']	['BDC', 'O']	2	2	6	2	6	10	2	6	2	2	0	0	0	C1=CC(=CC=C1C(=O)O)C(=O)O
35	UiO-66-MM(99)	2	['Zr']	['BDCCH3', 'O']	2	2	6	2	6	10	2	6	2	2	0	0	0	COC(=O)c1ccccc1C(=O)O
36	UiO-66-NH2(31, 42, 47, 97, 98, 311)	2	['Zr']	['BDCNH2', 'O']	2	2	6	2	6	10	2	6	2	2	0	0	0	C1=CC(=C(C=C1C(=O)O)N)C(=O)O
37	CAU-10-CH3(59)	2	['Al']	['ISOCH3', 'OH']	2	2	6	2	1	0	0	0	0	0	0	0	0	CC1=CC(=CC(=C1)C(=O)O)C(=O)O
38	CAU-10-H(59)	2	['Al']	['ISO', 'OH']	2	2	6	2	1	0	0	0	0	0	0	0	0	C1=CC(=CC(=C1)C(=O)O)C(=O)O
39	CAU-10-NH2(59)	2	['Al']	['ISONH2', 'OH']	2	2	6	2	1	0	0	0	0	0	0	0	0	C1=C(C=C(C=C1C(=O)O)N)C(=O)O
40	CAU-10-NO2(59)	2	['Al']	['ISONO2', 'OH']	2	2	6	2	1	0	0	0	0	0	0	0	0	C1=C(C=C(C=C1C(=O)O)[N+](=O)[O-])C(=O)O
41	CAU-10Ã‚Â‰ÃƒÂ›ÃƒÂ’OCH3(59)	2	['Al']	['ISOOCH3', 'OH']	2	2	6	2	1	0	0	0	0	0	0	0	0	CC1=CC(=CC(=C1)C(=O)O)C(=O)O
42	CAU-10-OH(59)	2	['Al']	['ISOOH', 'OH']	2	2	6	2	1	0	0	0	0	0	0	0	0	C1=C(C=C(C=C1C(=O)O)O)C(=O)O
43	Co-NIC(293)	2	['Co']	['NIC', 'H2O']	2	2	6	2	6	7	2	0	0	0	0	0	0	C1=CC(=CN=C1)C(=O)O
44	Cu-PCN(293)	2	['Cu']	['PCN', 'H2O']	2	2	6	2	6	10	1	0	0	0	0	0	0	CC(=NNC(=O)C1=CC=NC=C1)C(=O)O
45	MIL-53-F(Al)(312)	2	['Al']	['BDCF', 'OH']	2	2	6	2	1	0	0	0	0	0	0	0	0	C1=CC(=C(C=C1C(=O)O)F)C(=O)O
46	N/A(54)	2	['Al']	['NDC', 'OH']	2	2	6	2	1	0	0	0	0	0	0	0	0	C1=CC=C2C(=C1)C(=CC=C2C(=O)O)C(=O)O
47	UiO-66-Br(42, 311)	2	['Zr']	['BDCBr', 'O']	2	2	6	2	6	10	2	6	2	2	0	0	0	C1=CC(=C(C=C1C(=O)O)Br)C(=O)O
48	UiO-67(98, 101, 283, 310)	2	['Zr']	['BPDC', 'O']	2	2	6	2	6	10	2	6	2	2	0	0	0	C1=CC(=CC=C1C2=CC=C(C=C2)C(=O)O)C(=O)O
49	ZIF-7(293)	2	['Zn']	['PHIM']	2	2	6	2	6	10	2	0	0	0	0	0	0	C1=CC=C2C(=C1)NC=N2
50	Zn-TTC(293)	2	['Zn']	['TTC', 'OH', 'H2O']	2	2	6	2	6	10	2	0	0	0	0	0	0	C1(C(C(OC1C(=O)O)C(=O)O)C(=O)O)C(=O)O
51	Zr-DMBDC(162)	2	['Zn']	['DMBDC', 'O']	2	2	6	2	6	10	2	0	0	0	0	0	0	C1=C(C(=CC(=C1S)C(=O)O)S)C(=O)O
52	Bio-MOF-13(95)	2	['Co']	['AD', 'C3H7CO2']	2	2	6	2	6	7	2	0	0	0	0	0	0	C1=NC2=NC=NC(=C2N1)N
53	CUK-1(314)	2	['Co']	['PDC', 'OH']	2	2	6	2	6	7	2	0	0	0	0	0	0	C1=CN=C(C=C1C(=O)O)C(=O)O
54	DUT-68(Zr)(56)	2	['Zr']	['TDC', 'O', 'OH']	2	2	6	2	6	10	2	6	2	2	0	0	0	C1=C(SC(=C1)C(=O)O)C(=O)O
55	DUT-69(Zr)(56)	2	['Zr']	['TDC', 'O', 'OH']	2	2	6	2	6	10	2	6	2	2	0	0	0	C1=C(SC(=C1)C(=O)O)C(=O)O
56	MIL-140 A(101)	2	['Zr']	['BDC', 'O']	2	2	6	2	6	10	2	6	2	2	0	0	0	C1=CC(=CC=C1C(=O)O)C(=O)O
57	MIL-140 B(101)	2	['Zr']	['NDC', 'O']	2	2	6	2	6	10	2	6	2	2	0	0	0	C1=CC2=C(C=CC(=C2)C(=O)O)C=C1C(=O)O
58	MIL-140 C(101)	2	['Zr']	['BPDC', 'O']	2	2	6	2	6	10	2	6	2	2	0	0	0	C1=CC(=CC=C1C2=CC=C(C=C2)C(=O)O)C(=O)O
59	MIL-140 D(101)	2	['Zr']	['ABDC', 'O']	2	2	6	2	6	10	2	6	2	2	0	0	0	C1=CC(=CC(=C1)N=NC2=CC=CC(=C2)C(=O)O)C(=O)O
60	MOFF-2(84)	2	['Cu']	['L11', 'DABCO']	2	2	6	2	6	10	1	0	0	0	0	0	0	C1CN2CCN1CC2
61	MOOFOUR-1-Ni(315)	2	['Ni']	['BPE', 'O']	2	2	6	2	6	8	2	0	0	0	0	0	0	C1=CN=CC=C1C=CC2=CC=NC=C2
62	N/A(81)	2	['Zn']	['L4']	2	2	6	2	6	10	2	0	0	0	0	0	0	C1=C(C=C(N=C1C(=O)O)C(=O)O)C2=CC(=NC(=C2)C(=O)O)C(=O)O
63	N/A(318)	2	['Ni']	['HPTZ']	2	2	6	2	6	8	2	0	0	0	0	0	0	C1=CC(=CC=C1N2C=NN=C2)P(=O)(O)O
64	N/A(79)	2	['Ni']	['L13']	2	2	6	2	6	8	2	0	0	0	0	0	0	C1=CC(=CC=C1C2=CC(=CN=C2)C3=CC=C(C=C3)C(=O)O)C(=O)O
65	N/A(79)	2	['Co']	['L13']	2	2	6	2	6	7	2	0	0	0	0	0	0	C1=CC(=CC=C1C2=CC(=CN=C2)C3=CC=C(C=C3)C(=O)O)C(=O)O
66	PCN-56(263)	2	['Zr']	['TPDC2CH3', 'OH', 'O']	2	2	6	2	6	10	2	6	2	2	0	0	0	CC1=CC(=C(C=C1C2=CC=C(C=C2)C(=O)O)C)C3=CC=C(C=C3)C(=O)O
67	PCN-57(263)	2	['Zr']	['TPDC4CH3', 'OH', 'O']	2	2	6	2	6	10	2	6	2	2	0	0	0	C1=CC(=CC=C1C2=C(C(=C(C(=C2C3=CC=C(C=C3)C(=O)O)C4=CC=C(C=C4)C(=O)O)C5=CC=C(C=C5)C(=O)O)C6=CC=C(C=C6)C(=O)O)C7=CC=C(C=C7)C(=O)O)C(=O)O
68	SIFSIX-2-Cu-i(134)	2	['Cu']	['DPA', 'SiF4', 'F']	2	2	6	2	6	10	1	0	0	0	0	0	0	C1=CN=CC=C1C#CC2=CC=NC=C2
69	UiO-1,4-NDC(97)	2	['Zr']	['NDC', 'O']	2	2	6	2	6	10	2	6	2	2	0	0	0	C1=CC=C2C(=C1)C(=CC=C2C(=O)O)C(=O)O
70	UiO-2,6-NDC(101, 103)	2	['Zr']	['NDC', 'O']	2	2	6	2	6	10	2	6	2	2	0	0	0	C1=CC2=C(C=CC(=C2)C(=O)O)C=C1C(=O)O
71	UiO-66-(CO2H)2(322)	2	['Zr']	['BDCCooh', 'O']	2	2	6	2	6	10	2	6	2	2	0	0	0	C1=CC(=CC=C1C(=O)[O-])C(=O)[O-]
72	UiO-66-(OMe)2(97)	2	['Zr']	['BDC', 'O']	2	2	6	2	6	10	2	6	2	2	0	0	0	COC1=CC(=C(C=C1C(=O)O)OC)C(=O)O
73	UiO-66-Br2(322)	2	['Zr']	['BDCBr', 'O']	2	2	6	2	6	10	2	6	2	2	0	0	0	C1=C(C(=CC(=C1Br)C(=O)O)Br)C(=O)O
74	UiO-66-CF3(322)	2	['Zr']	['BDC', 'O']	2	2	6	2	6	10	2	6	2	2	0	0	0	C1=CC(=C(C=C1C(=O)O)C(F)(F)F)C(=O)O
75	UiO-66-Cl2(322)	2	['Zr']	['BDCCl', 'O']	2	2	6	2	6	10	2	6	2	2	0	0	0	C1=C(C(=CC(=C1Cl)C(=O)O)Cl)C(=O)O
76	UiO-66-CO2H(323)	2	['Zr']	['BDCCooh', 'O']	2	2	6	2	6	10	2	6	2	2	0	0	0	O=C(OCCCCCCCCCC)C1=CC=C(C(=O)OCCCCCCCCCC)C(=C1)C(=O)OCCCCCCCCCC
77	UiO-66-DM(100)	2	['Zr']	['BDCCH3', 'O']	2	2	6	2	6	10	2	6	2	2	0	0	0	CC1=CC(=C(C=C1C)C(=O)O)C(=O)O
78	UiO-66-I(323)	2	['Zr']	['BDC', 'O']	2	2	6	2	6	10	2	6	2	2	0	0	0	O=C(O)C1=CC=C(C(=O)O)C(I)=C1
79	UiO-66-NO2(97, 311)	2	['Zr']	['BDCNO2', 'O']	2	2	6	2	6	10	2	6	2	2	0	0	0	C1=CC(=C(C=C1C(=O)O)[N+](=O)[O-])C(=O)O
80	UiO-66-SO3H(323)	2	['Zr']	['BDC', 'O']	2	2	6	2	6	10	2	6	2	2	0	0	0	C1=CC(=C(C=C1S(=O)(=O)O)C(=O)O)C(=O)O
81	UMCM-150(63)	2	['Cu']	['BHTC']	2	2	6	2	6	10	1	0	0	0	0	0	0	C1=CC=C(C=C1)C2=CC(=CC(=C2)C(=O)O)C(=O)O
82	ZIF-11(105)	2	['Zn']	['PHIM']	2	2	6	2	6	10	2	0	0	0	0	0	0	C1=CC=C(C=C1)N2C=NC3=CC=CC=C32
83	Zn(NDI-H)(96)	2	['Zn']	['NDI']	2	2	6	2	6	10	2	0	0	0	0	0	0	CC1=C(C(=NN1)C)N
84	Zr-fum(324)	2	['Zr']	['FUM', 'O']	2	2	6	2	6	10	2	6	2	2	0	0	0	C(=CC(=O)O)C(=O)O
85	CAU-6(110)	1	['Al']	['BDCNH2', 'Cl', 'OH', 'H2O']	2	2	6	2	1	0	0	0	0	0	0	0	0	C1=CC(=C(C=C1C(=O)O)N)C(=O)O
86	Co-MOF-74/Co-CPO-27/Co-DOBDC(110, 132, 325)	1	['Co']	['DOBDC']	2	2	6	2	6	7	2	0	0	0	0	0	0	C1=C(C(=CC(=C1O)C(=O)O)O)C(=O)O
87	Cu-BTC/HKUST-1(28, 31, 39, 41, 62, 63, 326)	1	['Cu']	['BTC']	2	2	6	2	6	10	1	0	0	0	0	0	0	C1=C(C=C(C=C1C(=O)O)C(=O)O)C(=O)O
88	Mg-MOF-74/Mg-CPO-27/Mg-DOBDC(31, 110, 132, 133, 270)	1	['Mg']	['DOBDC']	2	2	6	2	0	0	0	0	0	0	0	0	0	C1=C(C(=CC(=C1O)C(=O)O)O)C(=O)O
89	MIL-101-NO2(Cr)(51, 52)	1	['Cr']	['BDCNO2', 'F', 'O', 'H2O']	2	2	6	2	6	5	1	0	0	0	0	0	0	C1=CC(=C(C=C1C(=O)O)[N+](=O)[O-])C(=O)O
90	MIL-47-F(V)(312)	1	['V']	['BDCF', 'O']	2	2	6	2	6	3	2	0	0	0	0	0	0	C1=CC(=C(C=C1C(=O)O)F)C(=O)O
91	MIL-69(Al)/DUT-4(28)	1	['Al']	['NDC', 'OH']	2	2	6	2	1	0	0	0	0	0	0	0	0	C1=CC2=C(C=CC(=C2)C(=O)O)C=C1C(=O)O
92	MOF-14(327)	1	['Cu']	['BTB', 'H2O']	2	2	6	2	6	10	1	0	0	0	0	0	0	C1=CC(=CC=C1C(=O)O)OC2=CC(=CC(=C2)OC3=CC=C(C=C3)C(=O)O)OC4=CC=C(C=C4)C(=O)O
93	MOF-805(110)	1	['Zr']	['NDC2OH', 'OH', 'O']	2	2	6	2	6	10	2	6	2	2	0	0	0	C1=CC(=C(C2=C1C(=C(C=C2)C(=O)O)O)O)C(=O)O
94	MOF-806(110)	1	['Zr']	['BPDC2OH', 'OH', 'O']	2	2	6	2	6	10	2	6	2	2	0	0	0	C1=CC(=C(C=C1C2=CC(=C(C=C2)O)C(=O)O)C(=O)O)O
95	MOF-808(110)	1	['Zr']	['BTC', 'cooh', 'OH', 'O']	2	2	6	2	6	10	2	6	2	2	0	0	0	C1=C(C=C(C=C1C(=O)O)C(=O)O)C(=O)O
96	Ni-MOF-74/Ni-CPO-27/Ni-DOBDC(110, 132, 270)	1	['Ni']	['DOBDC']	2	2	6	2	6	8	2	0	0	0	0	0	0	C1=C(C(=CC(=C1O)C(=O)O)O)C(=O)O
97	Zn-MOF-74/Zn-CPO-27/Zn-DOBDC(62, 132)	1	['Zn']	['DOBDC']	2	2	6	2	6	10	2	0	0	0	0	0	0	C1=C(C(=CC(=C1O)C(=O)O)O)C(=O)O
98	IRMOF-1-CF3O/MOF-5-CF3O/Banasorb-22(64)	1	['Zn']	['BDCOCF3', 'O']	2	2	6	2	6	10	2	0	0	0	0	0	0	C1=CC(=C(C=C1C(=O)O)OC(F)(F)F)C(=O)O
99	Cu-EBTC(274)	1	['Cu']	['BTCEt', 'H2O']	2	2	6	2	6	10	1	0	0	0	0	0	0	CCc1c(C(=O)O)cc(C(=O)O)cc1C(=O)O
100	Cu-HF(292)	1	['Cu']	['HFIPBB']	2	2	6	2	6	10	1	0	0	0	0	0	0	C1=CC(=CC=C1C(=O)O)C(C2=CC=C(C=C2)C(=O)O)(C(F)(F)F)C(F)(F)F
101	Cu-MBTC(274)	1	['Cu']	['BTCM', 'H2O']	2	2	6	2	6	10	1	0	0	0	0	0	0	Cc1c(C(=O)O)cc(C(=O)O)cc1C(=O)O
102	IRMOF-1-(CH3)2/MOF-5-(CH3)2(66)	1	['Zn']	['BDCCH3', 'O']	2	2	6	2	6	10	2	0	0	0	0	0	0	CC1=CC(=C(C=C1C(=O)O)C)C(=O)O
103	IRMOF-1-CH3/MOF-5-CH3(66)	1	['Zn']	['BDCCH3', 'O']	2	2	6	2	6	10	2	0	0	0	0	0	0	CC1=C(C=CC(=C1)C(=O)O)C(=O)O
104	IRMOF-3-AM15(65)	1	['Zn']	['BDCNH2', 'O']	2	2	6	2	6	10	2	0	0	0	0	0	0	C1=CC(=C(C=C1C(=O)O)N)C(=O)O
105	IRMOF-3/MOF-5-NH2(65)	1	['Zn']	['BDCNH2', 'O']	2	2	6	2	6	10	2	0	0	0	0	0	0	C1=CC(=C(C=C1C(=O)O)N)C(=O)O
106	MIL-110 (Al)(62, 299)	1	['Al']	['BTC', 'OH', 'H2O']	2	2	6	2	1	0	0	0	0	0	0	0	0	C1=C(C=C(C=C1C(=O)O)C(=O)O)C(=O)O
107	MIL-125 (Ti)(46, 48)	1	['Ti']	['BDC', 'O', 'OH']	2	2	6	2	6	2	2	0	0	0	0	0	0	C1=CC(=C(C=C1C(=O)[O-])N)C(=O)[O-]
108	N/A(275)	1	['Cu']	['TPTC-O']	2	2	6	2	6	10	1	0	0	0	0	0	0	C1=CC(=CC=C1C2=CC(=CC(=C2)C(=O)O)C(=O)O)C3=CC(=CC(=C3)C(=O)O)C(=O)O
109	N/A(275)	1	['Cu']	['TPTC-O']	2	2	6	2	6	10	1	0	0	0	0	0	0	C1=CC(=CC=C1C2=CC(=CC(=C2)C(=O)O)C(=O)O)C3=CC(=CC(=C3)C(=O)O)C(=O)O
110	N/A(275)	1	['Cu']	['TPTC-O']	2	2	6	2	6	10	1	0	0	0	0	0	0	C1=CC(=CC=C1C2=CC(=CC(=C2)C(=O)O)C(=O)O)C3=CC(=CC(=C3)C(=O)O)C(=O)O
111	SIFSIX-3-Zn(134)	1	['Zn']	['PYR', 'SiF4', 'F']	2	2	6	2	6	10	2	0	0	0	0	0	0	C1=CN=CC=N1
112	UiO-66-F2(322)	1	['Zr']	['BDCF', 'O']	2	2	6	2	6	10	2	6	2	2	0	0	0	C1=C(C(=CC(=C1F)C(=O)O)F)C(=O)O
113	UiO-66-F(322)	1	['Zr']	['BDCF', 'O']	2	2	6	2	6	10	2	6	2	2	0	0	0	C1=CC(=C(C=C1C(=O)O)F)C(=O)O
114	Zr6O6(ABDC-Cl2)12(101, 310)	1	['Zr']	['ABDCCl2', 'O']	2	2	6	2	6	10	2	6	2	2	0	0	0	C1=CC(=CC=C1C(=O)O)N=NC2=CC=C(C=C2)C(=O)O
115	Zr6O6(ABDC)12(102)	1	['Zr']	['ABDC', 'O']	2	2	6	2	6	10	2	6	2	2	0	0	0	C1=CC(=CC=C1C(=O)O)N=NC2=CC=C(C=C2)C(=O)O
116	IRMOF-1/MOF-5(62-67)	0	['Zn']	['BDC', 'O']	2	2	6	2	6	10	2	0	0	0	0	0	0	C1=CC(=CC=C1C(=O)O)C(=O)O
117	MOF-177(63, 68, 69)	0	['Zn']	['BTB', 'O']	2	2	6	2	6	10	2	0	0	0	0	0	0	C1=CC(=CC=C1C2=CC(=CC(=C2)C3=CC=C(C=C3)C(=O)O)C4=CC=C(C=C4)C(=O)O)C(=O)O
118	MOF-69C(62)	0	['Zn']	['BDC', 'H2O']	2	2	6	2	6	10	2	0	0	0	0	0	0	C1=CC(=CC=C1C(=O)O)C(=O)O
119	UiO-BPY(98)	0	['Zr']	['BPY', 'O']	2	2	6	2	6	10	2	6	2	2	0	0	0	C1=CC=NC(=C1)C2=CC=NC=C2
120	Bio-MOF-11(95)	0	['Co']	['AD', 'AC']	2	2	6	2	6	7	2	0	0	0	0	0	0	C1=NC2=NC=NC(=C2N1)N
121	Bio-MOF-12(95)	0	['Co']	['AD', 'CH']	2	2	6	2	6	7	2	0	0	0	0	0	0	C1=NC2=NC=NC(=C2N1)N
122	MIL-47(V)(268)	0	['V']	['BDC', 'O']	2	2	6	2	6	3	2	0	0	0	0	0	0	C1=CC(=CC=C1C(=O)O)C(=O)O
123	MOF-505(63)	0	['Cu']	['BPTC']	2	2	6	2	6	10	1	0	0	0	0	0	0	C1=C(C=C(C=C1C(=O)O)C(=O)O)C2=CC(=CC(=C2)C(=O)O)C(=O)O
124	N/A(275)	0	['Cu']	['TPTC-O']	2	2	6	2	6	10	1	0	0	0	0	0	0	C1=CC(=CC=C1C2=CC(=CC(=C2)C(=O)O)C(=O)O)C3=CC(=CC(=C3)C(=O)O)C(=O)O
125	Cu-Im	3	['Cu']	['Im']	3	2	6	2	6	10	1	0	0	0	0	0	0	CC1=NC=CN1
